# Supplementary material
Source: publisher site journal article supplement (https://www.degruyterbrill.com/publication/journal_key/ZGRE/downloadAsset/ZGRE_Jahresregister_ZGR%202024.pdf)
Supplement: Supplementary file 1 [file ZGRE_Jahresregister_ZGR%202024.pdf]

# **ZEITSCHRIFT FÜR UNTERNEHMENS- UND GESELLSCHAFTSRECHT**

**HERAUSGEGEBEN von von Alfred Bergmann, Manfred Born, Ingo Drescher, Holger  
Fleischer, Stephan Harbarth, Jens Koch, Gerd Krieger, Hanno Merkt, Dörte Poelzig,  
Christoph Teichmann, Jochen Vetter, Marc-Philippe Weller, Hartmut Wicke**

**ZEITSCHRIFT FÜR UNTERNEHMENS- UND GESELLSCHAFTSRECHT**  
**PEER REVIEWED JOURNAL**

BEGRÜNDET VON MARCUS LUTTER UND HERBERT WIEDEMANN

**HERAUSGEBER**

Vorsitzender Richter am Bundesgerichtshof a.D. Professor Dr. Alfred Bergmann, Karlsruhe;  
Vorsitzender Richter am Bundesgerichtshof Manfred Born, Karlsruhe;  
Vorsitzender Richter am Bundesgerichtshof a.D. Professor Dr. Ingo Drescher, Karlsruhe;  
Professor Dr. Dr. h.c. Holger Fleischer, LL.M. (geschäftsführend), MPI Hamburg;  
Präsident des Bundesverfassungsgerichts Professor Dr. Stephan Harbarth, LL.M., Karlsruhe;  
Professor Dr. Jens Koch, Universität Köln;  
Rechtsanwalt Professor Dr. Gerd Krieger, Düsseldorf;  
Professor Dr. Hanno Merkt, LL.M. (geschäftsführend), Universität Freiburg, Richter am OLG Karlsruhe;  
Professorin Dr. Dörte Poelzig, M.Jur., Universität Hamburg;  
Professor Dr. Christoph Teichmann, Universität Würzburg;  
Rechtsanwalt Professor Dr. Jochen Vetter, München;  
Professor Dr. Marc-Philippe Weller (geschäftsführend), Universität Heidelberg;  
Notar Professor Dr. Hartmut Wicke, LL.M., München

**EHEMALIGE HERAUSGEBER, DERER TÄTIGKEIT SICH DIE AKTIVEN HERAUSGEBER IN**

**DANKBARKEIT ERINNERN** Rechtsanwalt und Notar Dr. Carl Hans Barz; Präsident des BGH Dr. Robert Fischer;  
Rechtsanwalt und Wirtschaftsprüfer Dr. Dr. h.c. Reinhard Goerdeler; Vorsitzender Richter am Bundesgerichtshof a.D. Professor Dr.  
Wulf Goette; Professor Dr. Dr. h.c. mult. Peter Hommelhoff; Professor Dr. Dr. Dr. h.c. mult. Klaus J. Hopt; Professor Dr. Dr. h.c. mult.  
Marcus Lutter; Präsident des BGH Professor Dr. Walter Odersky; Notar Professor Dr. Hans-Joachim Priester; Professor Dr. Herbert  
Wiedemann

**VERANTWORTLICHER HERAUSGEBER UND SCHRIFTFLEITER** Professor Dr. Hanno Merkt, Institut  
für ausländisches und internationales Privatrecht, Abt. II, Albert-Ludwigs-Universität Freiburg, Peterhof -  
Niemensstr. 10, D-79098 Freiburg, E-Mail: Hanno.Merkt@jura.uni-freiburg.de

**VERLAG** Walter de Gruyter GmbH, Berlin/Boston, Genthiner Straße 13, 10785 Berlin, Germany

**JOURNAL COORDINATOR** Jana Kuchta, De Gruyter, Genthiner Straße 13, 10785 Berlin,  
Germany, Tel.: +49 (0)30 260 05-228, Fax: +49 (0)30 260 05-250,  
E-Mail: jana.kuchta@degruyter.com

**ANZEIGEN** E-Mail: anzeigen@degruyter.com

Die Zeitschrift und alle in ihr enthaltenen einzelnen Beiträge und Abbildungen sind urheberrechtlich geschützt. Das gilt auch für die veröffentlichten Leitsätze, denn diese sind geschützt, soweit sie vom Einsender oder von der Schriftleitung erarbeitet oder redigiert worden sind. Jede Verwertung außerhalb der engen Grenzen des Urheberrechtsgesetzes ist ohne Zustimmung des Verlages unzulässig und strafbar. Das gilt insbesondere für Vervielfältigungen, Übersetzungen, Mikroverfilmungen und die Einspeicherung und Verarbeitung in elektronischen Systemen. Fotokopien für den persönlichen und sonstigen eigenen Gebrauch dürfen nur von einzelnen Beiträgen oder Teilen daraus als Einzelkopien hergestellt werden. Jede im Bereich eines gewerblichen Unternehmens hergestellte oder benutzte Kopie dient gewerblichen Zwecken gem. § 54 (2) UrhG und verpflichtet zur Gebührenzahlung an die VG WORT, Abteilung Wissenschaft, Goethestraße 49, D-80336 München, von der die einzelnen Zahlungsmodalitäten zu erfragen sind.

ISSN 0340-2479 · e-ISSN 1612-7048

Alle Informationen zur Zeitschrift, wie Hinweise für Autoren, Open Access, Bezugsbedingungen und Bestellformulare, sind online zu finden unter [www.degruyter.com/zgr](http://www.degruyter.com/zgr)

© 2024 Walter de Gruyter GmbH, Berlin/Boston, Germany

**SATZ** jürgen ullrich typosatz, Nördlingen

**DRUCK** Franz X. Stücker Druck und Verlag e.K., Ettenheim

Fragen zur allgemeinen Produktsicherheit:  
[productsafety@degruyterbrill.com](mailto:productsafety@degruyterbrill.com)

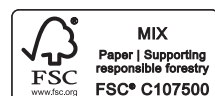

# Inhaltsverzeichnis

|                                                                                                                                                      |     |
|------------------------------------------------------------------------------------------------------------------------------------------------------|-----|
| AGSTNER, PETER/FLEISCHER, HOLGER: Russian-Roulette-Klauseln vor deutschen und italienischen Gerichten . . . . .                                      | 933 |
| ALTMEPPEN, HOLGER/HOMMELHOFF, PETER: Gesetzgebungsvorschlag zur Reform des Aktienkonzeernrechts . . . . .                                            | 155 |
| ARTMANN, EVELINE: Die Flexible Kapitalgesellschaft („FlexCo“) in Österreich: Vorbild für Deutschland . . . . .                                       | 482 |
| BAYER, WALTER: Vorzugsaktien ohne Stimmrecht im Falle von Verschmelzung, Spaltung, Formwechsel – zugleich Nachlese zu BGHZ 229, 27 (Metro) . . . . . | 897 |
| BEUTHIEN, VOLKER: Bürgerlichrechtliche Innengesellschaft – zurück damit ins Römische Recht? . . . . .                                                | 549 |
| BUCK-HEEB, PETRA: Schwarmfinanzierung (Crowdfunding) als alternative Form der Unternehmensfinanzierung . . . . .                                     | 431 |
| BUEREN, ECKART: Green Finance, insbesondere Green Bonds . . . . .                                                                                    | 397 |
| EBKE, WERNER F.: „Great Cases, Like Hard Cases, Make Bad Law“: Wiercard, das FISG und die Notwendigkeit einer Audit Judgment Rule . . . . .          | 1   |
| FELDTHUSEN, RASMUS KRISTIAN/KLASS, SUSANNE/TEICHMANN, CHRISTOPH: Unternehmensträger mit Vermögensbindung . . . . .                                   | 862 |
| FLEISCHER, HOLGER/AGSTNER, PETER: Russian-Roulette-Klauseln vor deutschen und italienischen Gerichten . . . . .                                      | 833 |
| FLORSTEDT, TIMM: Mehrstimmrechtsaktien – Neue Wege zur erleichterten Eigenkapitalschöpfung für junge Wachstumsunternehmen . . . . .                  | 321 |
| FRITZ, DENNIS: Aktienrechtliche Sonderprüfungen bei nationalen und internationalen Unternehmensverbindungen . . . . .                                | 220 |
| HOFFMANN-BECKING, MICHAEL: Selbstdarstellung: 50 glückliche Anwaltsjahre – im Rückblick verklärt? . . . . .                                          | 677 |
| HOMMELHOFF, PETER/ALTMEPPEN, HOLGER/: Gesetzgebungsvorschlag zur Reform des Aktienkonzeernrechts . . . . .                                           | 155 |
| HOMMELHOFF, PETER: Gemeinwohlüter-Schutz in der Unternehmensgruppenach der CSDDD –zugleich Bemerkungen zur Richtlinien-Umsetzung . . . . .           | 811 |
| HOPT, KLAUS J./KLASS, SUSANNE: Mehrstimmrechtsaktien – Grundsatzprobleme, Regelungsbausteine, Praxisfragen . . . . .                                 | 84  |
| HÖßL, THERESA/CAMILLA SEEMANN, CAMILLA/WELLER, MARC-PHILIPPE: Greening Corporate Law – Klimatrias für das Gesellschaftsrechts . . . . .              | 180 |
| KLASS, SUSANNE/HOPT, KLAUS J.: Mehrstimmrechtsaktien – Grundsatzprobleme, Regelungsbausteine, Praxisfragen . . . . .                                 | 84  |
| KLASS, SUSANNE/TEICHMANN, CHRISTOPH/FELDTHUSEN, RASMUS KRISTIAN: Unternehmensträger mit Vermögensbindung . . . . .                                   | 862 |
| KRAFT, JULIA: Kontinuität in der Diskontinuität – Zur Einführung von Mehrstimmrechtsaktien durch Rechtsfortschreibung beim Formwechsel . . . . .     | 547 |

|                                                                                                                                                                                                                                                   |     |
|---------------------------------------------------------------------------------------------------------------------------------------------------------------------------------------------------------------------------------------------------|-----|
| KUNTZ, THILO: ESG: USA gegen Europa . . . . .                                                                                                                                                                                                     | 745 |
| LANGENBUCHER, KATJA: Rückgang börsennotierter Unternehmen: Gründe und rechtliche Gegenmaßnahmen . . . . .                                                                                                                                         | 287 |
| LÜDEKING, MATTHIAS/SIMA SAMARI: Dauertestamentsvollstreckung über den Anteil eines persönlich haftenden Gesellschafters nach dem Mo-PeG . . . . .                                                                                                 | 717 |
| MOCK, SEBASTIAN/MOHAMED, JEAN: Gegenleistung bei einer dem Erwerb gleichgestellten Vereinbarung im Übernahmerecht (§ 31 WpÜG) – zugleich Besprechung von BGH, Urt. v. 23. 5. 2023 – II ZR 219/21 (STADA Arzneimittel Aktiengesellschaft . . . . . | 637 |
| MOHAMED, JEAN/MOCK, SEBASTIAN: Gegenleistung bei einer dem Erwerb gleichgestellten Vereinbarung im Übernahmerecht (§ 31 WpÜG) – zugleich Besprechung von BGH, Urt. v. 23. 5. 2023 – II ZR 219/21 (STADA Arzneimittel Aktiengesellschaft . . . . . | 637 |
| RANG, ALEXANDER: Hybridanleihen in der Unternehmensfinanzierung und Instrumente des zusätzlichen Kernkapitals bei Banken . . . . .                                                                                                                | 457 |
| RUBNER, DANIEL: Kapitalerhöhung aus Gesellschaftsmitteln unter Ausschluss des Bezugsrechts – Ein Beitrag zur richterlichen Rechtsfortbildung der Aktiengewährung nach §§ 72a, 72b UmwG . . . . .                                                  | 596 |
| SCHAPER, MARTIN: Venture Capital in der Vertragsgestaltung . . . . .                                                                                                                                                                              | 509 |
| SCHIERECK, DIRK: Unternehmensfinanzierung in Umbruchzeiten: Herausforderungen und Perspektiven aus betriebswirtschaftlicher Sicht . . . . .                                                                                                       | 265 |
| SCHLITT, MICHAEL: Kapitalerhöhung . . . . .                                                                                                                                                                                                       | 356 |
| SEEMANN, CAMILLA/WELLER, MARC-PHILIPPE/HÖßL, THERESA/: Greening Corporate Law – Klimatrias für das Gesellschaftsrechts . . . . .                                                                                                                  | 180 |
| SIMA SAMARI/LÜDEKING, MATTHIAS: Dauertestamentsvollstreckung über den Anteil eines persönlich haftenden Gesellschafters nach dem Mo-PeG . . . . .                                                                                                 | 717 |
| TEICHMANN, CHRISTOPH/FELDTHUSEN, RASMUS KRISTIAN//KLASS, SUSANNE: Unternehmensträger mit Vermögensbindung . . . . .                                                                                                                               | 862 |
| WELLER, MARC-PHILIPPE/HÖßL, THERESA/CAMILLA SEEMANN, CAMILLA: Greening Corporate Law – Klimatrias für das Gesellschaftsrechts . . . . .                                                                                                           | 180 |
| WOLLENSCHLÄGER, BERNWARD: Die Auslegung von Umwandlungsverträgen als Rechtsproblem . . . . .                                                                                                                                                      | 692 |
| ZWIRLEIN-FORSCHNER, SUSANNE: Das Sein limitiert den Schein – zu Grund und Grenzen der negativen Registerpublizität. Zugleich Besprechung von BGH, Urt. v. 9. 1. 2024, II ZR 220/22 . . . . .                                                      | 662 |

# Sachregister

## Abschlussprüfer

- Abschlussprüferaufsichtsstelle (APAS) 15
- Alternativen zur Abschlussprüferhaftung 29
- angemessene Information 62
- Audit judgments 38 f
- Ausdifferenzierung der Fahrlässigkeitshaftung 18
- Ausweitung der strafrechtlichen Verantwortlichkeit des Prüfers 21
- Ausweitung der unbeschränkten Haftung 19
- bedingter Vorsatz 11
- Beispiele für Pflichtverletzungen 8
- Berufshaftpflichtversicherung 19, 27
- besonders schwere Sorgfaltspflichtverletzung 7
- Bestimmungsgrößen der Auswahlentscheidung 68
- Beurteilungs- und Entscheidungsfreiraum des Prüfers 54
- business judgment Rule 39
- defensive auditing 27, 38
- deliktische Verantwortlichkeit für Vermögensschäden 4
- einfache Fahrlässigkeit 5
- Einführung eines gesetzlichen Abschlussprüfers 37
- Fahrlässigkeit alte Regelung 4
- Fahrlässigkeit neue Regelung 4
- Feststellung des Verschuldensgrades 6
- Financial Statements Insurance 30
- gebundene Entscheidung 57 ff
- gesetzlicher 37
- grobe Fahrlässigkeit 6
- Grundsatz der Wesentlichkeit 70
- Haftung für Gehilfe 5
- Haftung gegenüber Dritten 4
- Haftung gegenüber geprüfter Gesellschaft 4
- Haftung wegen Sittenwidrigkeit 12
- haftungsbegründendes Verhalten 50
- Haftungshöchstsumme alte Regelung 4
- Haftungshöchstsumme neue Regelung 4
- Haftungsobergrenzen 3
- Haftungsverschärfung 3
- Haftungsverschärfung als Abschreckung 23
- Haftungsverschärfung als Qualitätssicherungsmittel 24
- Haftungsverschärfung in anderen Ländern 25
- Handeln im guten Glauben 77

- Informationsrechte des Prüfers 65
- Insolvenzmodell 28
- kritische Grundhaltung 73
- Kumulation von verschärfter strafrechtlicher Verantwortlichkeit und möglicherweise existenzgefährdender zivilrechtlicher Haftung 22
- Leichtfertigkeit 11
- möglicher Haftungsfreiraum 38
- neuer rechtlicher Rahmen 37
- objektiv-abstrakter Sorgfaltsmaßstab 7
- privity of contract 32
- prüferische Entscheidung 57 ff
- Prüfhandlungen 65 ff
- Prüfungsaussagen 63
- Prüfungsgegenstand 41 f
- Reasonable Belief-Test 74
- risikoorientierter Prüfungsansatz 72
- Rückgriff auf Verlautbarungen von Institutionen 46
- Rückschauverzerrung bei Feststellung des Verschuldensgrades 10
- strafrechtliche Verurteilung 14
- Transponierung der verschärften strafrechtlichen Verantwortlichkeit des Prüfers in das zivile Haftungsrecht 21
- True an fair view 44
- Überwachungserfolg 48
- Umfang der Prüfungshandlung 69
- unparteiisches Handeln 76
- Verlässlichkeit 67
- Verlautbarungen nationaler und internationaler Institutionen 46
- Versicherbarkeit von Berufshaftpflichtrisiken 27
- Verstaatlichung der Abschlussprüfung 30
- vertragliche Haftung alte Regelungen 4
- Vorsatz 6
- Windhund-Prinzip 28

## Abschlussprüferaufsichtsstelle (APAS)

- rechtliche Bindungswirkung von Entscheidungen 15

## Abschlussprüfung

- Grundsatz der Wesentlichkeit 45
- Rechnungslegungsprüfung 44
- Risiken 47
- True an fair view 44

## Aktien

- Golden shares 94
- Mehrstimmrechtsaktien 84 ff

- one share one vote-Prinzips 87
- Vorzugsaktien ohne Stimmrecht 897 ff

#### **Aktienamt 30**

#### **Aktiengesellschaft**

- Auslandsnotierungen 272
- Börsengang im Ausland 278
- Börsengang im Inland 278
- Compliancekosten 296
- Delaware General Corporate Law 301
- Delisting 270 f, 290
- Deregulierung des Rechts der Börsennotierung 300
- Familienunternehmen 291
- Folgen für die Mehrstimmrechtsaktien bei Spaltung 150
- Folgen für die Mehrstimmrechtsaktien bei Verschmelzung 150
- Kapitalstock 301
- Konzentrationsprozesse 289
- Kosten der Börsennotierung 291
- Maßnahmen gegen Rückgang börsennotierter Unternehmen 297 ff
- Mehrstimmrechtsaktien 126
- Mischbezugsrecht 343
- Mittelstand 291
- Notierungsdynamik 269 ff
- Notierungsstandort 278
- Pflichtprüfung 2
- Rückgang börsennotierter Unternehmen 287 ff
- Standortfaktor bei der Börsennotierung 298 ff
- steigende Marktkapitalisierung 289
- Stellenwert der Börsennotierung als Element der Unternehmensfinanzierung 291 f
- Trends bei der Unternehmensfinanzierung 266 ff
- Wachstumsunternehmen 292
- Wunsch nach Geheimhaltung 291
- Wunsch nach geringeren Transparenzanforderungen 291

#### **Aktienkonzernrecht**

- Konzernorganisationsfreiheit 162
- Organisationsstruktur 156
- Reformvorschlag 155 ff
- Risiko- und Haftungssegmentierung 160

#### **Aktienrecht**

- Aktiengattungen 331
- Aktiengesellschaftsrecht 301
- Alternativen zur Mehrstimmrechtsaktie 125
- Anreiz zum Formwechsel durch das ZuFinG 575 ff
- Anwendung von § 141 AktG in Umwandlungsfällen 915

- Bezugsrechtsemissionen 362 ff
- Deregulierung des Rechts der Börsennotierung 300
- Deregulierung im Wettbewerb mit den Niederlanden und den USA 300
- Digitalisierung der Aktien 305
- Gewährung art- oder gattungsgleicher Rechte 924
- Gruppenbezogene Sonderrechte genießen Gruppenschutz 901
- Höhe des Ausgabebetrages von Aktien im Rahmen einer Kapitalerhöhung 598
- Klimaberichtspflichten nach ARUG II 192
- Metro-Fall 910 ff
- Rechtslage bei Verschmelzung nach Inkrafttreten des UmwG 1995 906
- Rechtslage bei Verschmelzung vor Inkrafttreten des UmwG 1995 904
- richtlinienkonforme Auslegung im Anwendungsbereich von Art. 93 Abs. 2 GesRRL 915
- Schutz der Vorzugsaktionäre bei Umwandlungen 911
- Schutz vor nachteiligen Eingriffen bei stimmrechtslosen Vorzugsaktien 903
- Sonderprüfer 226
- Sonderprüfung 220 ff
- spezielle Regelung für Kapitalerhöhungen oder -herabsetzungen 902
- Spruchverfahren 598
- Vorstandsvergütung mit variablen, klimaschutzfördernden Vergütungsparametern 189
- Vorzugsaktien als Gattungs-Sonderrechte 900
- Vorzugsaktien ohne Stimmrecht 897 ff

#### **Aktienrechtliche Sonderprüfung**

- Aufhebungsbeschluss der Hauptversammlung 260 ff
- Auswirkungen eines aktienrechtlichen Squeeze-Out nach §§ 327a ff AktG 258 ff
- Beendigung 258 ff
- bei abhängigem Unternehmen 225
- bei herrschendem Unternehmen 224
- bei Schwesterunternehmen 226
- Bestellung des Prüfers 226 ff
- Durchsetzbarkeit der Rechte eines aktienrechtlichen Sonderprüfers 253
- Gegenstand 222
- internationale Sachverhalte 256
- konzernweite Dimension 222
- nationale Sachverhalte 253

#### **Aktienresearch**

- Entwicklung 277

- Qualitätsunterschiede 275 ff
- Reputationsaspekt 277
- Aktionär**
  - Aktionärsbindung der Mehrstimmrechtsaktien 135 ff
  - Ausübung des Mehrstimmrechts 130 ff
  - Begrenzung des Stimmgewichts 130 ff
  - Bezugsrechtsemissionen 362 ff
  - Mindestaktienbesitz 129
  - persönliche Voraussetzungen für Mehrstimmrechtsaktionäre 128
  - Veräußerung ihr Mehrstimmrecht 137
- Aktionärsschutz**
  - Mehrstimmrechte im System des Aktionärsschutzes 344
  - Schutz durch Information 347
  - Vermögensentzug durch Vergütung 345
- AT1-Kapitalinstrumente** 459 ff
  - Durchbrechung der Kapitalhierarchie 473
  - Flexibilität der Zinszahlungen 466
  - Prinzip der Permanenz 461
  - Verlustabsorption 470
- Audit Judgment Rule** 1 ff, 39
  - Abschlussprüfung 44
  - angemessene Information 62
  - Anwendungsbereich 77 ff
  - Bestimmungsgrößen der Auswahlentscheidung 68
  - Beurteilungs- und Entscheidungsfreiraum des Prüfers 54
  - Dritthaftungsrisiko 81
  - Erkenntnisse aus dem Ausland 39
  - gebundene Entscheidung 57 ff
  - gesetzliche Anerkennung 53
  - Grundsatz der Wesentlichkeit 70
  - Haftung gegenüber der Gesellschaft und verbundenen Unternehmen 78 ff
  - Haftung gegenüber Dritten 80 ff
  - Handeln im guten Glauben 77
  - in der Rechtsprechung 39
  - Konkretisierung der prüferische Entscheidung 60 ff
  - prüferische Entscheidung 57 ff
  - Prüfungsgegenstand 41 f
  - Reasonable Belief-Test 74
  - risikoorientierter Prüfungsansatz 72
  - Safe Harbor 56
  - Überwachungserfolg 48
  - Umfang der Prüfungshandlung 69
  - unparteiisches Handeln 76
  - Unterschiede zu BJR 40
  - unterschiedliche Behandlung von Vorständen und Abschlussprüfern 79
  - verschärfte Haftungsregelungen 4
- Verstoß gegen gesetzliche oder vertragliche Pflichten 59 ff
- Voraussetzungen 57
- Back-End-Game** 647
- Backend-Speculation** 647
- Barausgleichsanspruch** 382
  - Rechtsschutzmöglichkeiten der außenstehenden Gesellschafter 386
- Benefit Corporation** 195
- Bezugsrechtsemissionen** 362
  - angemessene Offenlegungsregelungen 364
  - Bezugsfrist 363
  - Festlegung des Platzierungspreises 368
  - Nutzung von genehmigtem Kapital 362 ff
  - Prospektpflicht 364
  - Schaffung des genehmigten Kapitals 362
  - Schaffung von Ermächtigungsrahmen 363
  - Zapf Creation-Rechtsprechung 385
- Börse**
  - Aktienresearch 275 ff
  - Anpassungen in den Geschäftsmodellen für Aktienresearch 275
  - Börsengang von Start-Ups 323
  - digitales Ökosystem 273
  - Direktinvestition an einer ausländischen Börse 298
  - Entwicklung bei den Fachmedien 277
  - Finanzplatz-Ökosystem 277
  - globaleren Wettbewerb 277
  - Green-Bonds-Segmente 421
  - Intermediärsfunktion 274
  - Konzentrationsprozesse 289
  - listing gap 288
  - Monetarisierungsmöglichkeiten von spezialisiertem Wissen 274
  - multi-sided market 274
  - Notierungsdynamik 273
  - Qualitätsunterschiede zwischen bezahltem und unbezahltem Research 276 ff
  - Rückgang der Anzahl börsennotierter Gesellschaften 288
  - verzögerte Börsengang 324 f
- Bruchteilsgemeinschaft**
  - Verhältnis zur Innengesellschaft 553 ff
- Bürgerlichrechtliche Innengesellschaft**
  - Bruchteilsgemeinschaft der Gesellschafter 561
  - Bruchteilsvermögen bei der Innengesellschaft 563
  - gesellschaftsrechtlich verfasste Organisation 553
  - Gesellschaftsrechtsentwicklung der Innengesellschaft 570

- Grenzen einer Bruchteilsgemeinschaft 562
- Grundstruktur 550
- Organisationsvertrages 553
- rechtlichen Fähigkeiten 569
- Rechtsfolgen eines Statuswechsels 570
- Rechtsverhältnisse unter den Gesellschaftern 556
- Schuldvertrag 554 f
- seit Inkrafttreten des MoPeG 551
- Vergleich mit der handelsrechtlichen Stillen Gesellschaft 560
- Verhältnis zur Bruchteilsgemeinschaft 553 ff
- Vermögensstruktur 561
- zweitrangige Bedeutung der Bruchteilsgemeinschaft 557
- Business Judgment Ruls**
  - Begriff 39
  - Unterschiede zu AJR 40
- Buy-Sell-Vereinbarungen** 935 ff
- Climate Bonds Initiative (CBI)** 412
- Climate Bonds Standard (CBS)** 419
- Climate Reporting** 188
- Climate-Change Disclosure Rules** 746, 773
- Corporate Climate Enforcement** 180 ff
- Corporate Climate Responsibility** 185 ff
- Corporate Governance**
  - Corporate Governance-Instrumente mit Klimabezug 196 ff
  - Klimagovernance 216 ff
  - Klimaessorts auf Leitungsebene 197
  - Klimaschutzinstrumente 183
  - Say on Climate 197
- Corporate Sustainability Due Diligence Directive (CSDDD-Entwurf)** 182
- Corporate Sustainability Due Diligence Directive (CSDDD)**
  - Einbau der gruppenspezifischen Vorgaben in das Lieferkettensorgfaltspflichtengesetz mit Ersatz dessen bisherigen § 2 Abs. 6 Satz 3 859
  - Einbeziehung des Gemeinwohlglüterschutz in die Unternehmenspolitik 857
  - Erfüllungsübernahme nach Art. 6 827
  - Ergebnisse zur TochterGmbH unter der CSDDD 855
  - Ermächtigung zur Erfüllungsübernahme 834
  - Finanzholding 828
  - Gemeinwohlglüter-Schutz in der Unternehmensgruppe 811 ff
  - Genuin unternehmensleitende Schutzmaßnahmen 836
  - geschäftsleitende Holding 820
  - Grenze beim CSDDD-Gemeinwohlglüter-Schutz 849
  - Kontrolle eines anderen Unternehmens 814 f
  - konzernrechtliche Impulse aus dem Unionsrecht 860
  - Mängel einer System-Verdoppelung 821
  - mehrstufige Unternehmensgruppe 832
  - mehrstufige Unternehmensgruppenstruktur 814
  - organisationsrechtliche CSDDD-Impulse 857
  - Pflichtenübertragung von der Mutter auf die Tochter 825
  - Quellen-naher Güterschutz 820
  - Restpflichten der Tochtergeschäftsleitungen 818
  - Risikomanagementsysteme der Tochter zum Schutze der Gemeinwohlglüter in ihrem Aktivitätsbereich 846
  - Schutz der Gemeinwohlglüter im Aktivitätsbereich der Tochter 846
  - Schutz im Tochterbereich unter einer originär schutzpflchtigen Mutter 826
  - schutzpflchtige Gruppenmutter 819
  - schutzpflchtige Unternehmensgruppe 816
  - Schutzpolitik und Umsetzungsstrategie bei Übernahme des Gemeinwohlglüter-Schutzes 836 f
  - Töchter schutzpflchtig für ihren jeweiligen Aktivitätsbereich schutzpflchtig 821
  - transformative Normierung in Deutschland 850
  - übernahmefähiger Schutzmaßnahmen 835
  - Übertragung der Schutzpflichten auf an sich schutzpflchtfreie Töchter 830
  - Unternehmensgruppe 813
  - Unternehmensgruppendefinition 813
  - Unterstützung auf der Gruppenebene 833 ff
  - Verlagerungs-Ermächtigung im Transformationsgesetz 831
  - verstärkende Absicherung der Tochtersysteme 822
  - Vorsorgemaßnahmen 838
  - Ziele der Systemkontrolle 823
  - zivilrechtliche Haftung der Tochter trotz Erfüllungsübernahme 848
  - zusätzliche Verantwortlichkeit der Holding 821
- Corporate Sustainability Reporting Directive (CSRD)** 182
- Crowdfunding**
  - Akteure 440
  - Anlagehöchstgrenze 448



- Anlegerschutz 442 ff
- Begrenzungen 445
- belohnendes 436
- Crowdfunding-Dienstleister 445
- Crowdinvesting 437
- Crowdinvesting-Plattformen 434
- Crowdlending 437, 450
- Crowdlending-Plattformen 435
- Crowdsponsoring 436
- Deutschland 434
- Donation-Based Crowdfunding 436
- Emissions- bzw. Kreditvolumen 445
- empirische Befunde 434
- erfasste Anlagen 450
- erfasste Finanzierungen 450
- Erscheinungsformen 436
- European Crowdfunding Service Provider Regulation 436
- gesetzliche Regulierung 439
- Grundlagen 434
- Haftung für das Informationsblatt 453
- Informationsblatt 453 f
- Internet-Dienstleistungsplattform 444
- Internet-Plattform als Intermediär 444
- Kapitalgeber des Risikokapitals 441
- kapitalsuchendes Unternehmen 440
- Kreis der Haftungsadressaten 454
- partiarisches Darlehen 451
- Pre-Purchase Crowdfunding 436
- profitorientiertes 437
- Reward-Based Crowdfunding 436
- Rück- und Zinszahlungsansprüche 451
- Schwarmfinanzierungsverordnung (ECSP-VO) 432
- spendenbasiertes 436
- stille Beteiligung 451
- Unklarheiten bzgl. der ECSP-VO 452 f
- Unklarheiten bzgl. des VermAnlG 450 ff
- Vermögensanlagen-Informationsblatt 439 ff
- Crowdinvesting** 432, 437
- Crowdlending** 432, 437
- Crowdsponsoring** 436
- Dauertestamentsvollstreckung über Anteile eines persönlich haftenden Gesellschafters**
  - Interesse der Gesellschaftsgläubiger 733
  - Dauervollstreckung nur in Bezug auf den Kommanditanteil 724
  - dogmatische Probleme 722
  - Eintragung eines Testamentsvollstreckervermerks im Gesellschafts- oder Handelsregister 729
  - Eintragungsfähigkeit und -pflichtigkeit des Testamentsvollstreckervermerks 730 f
  - Erbe als Gläubiger von Altschulden 733 f
  - Erbe als Gläubiger von Neuschulden 738 f
  - Gesellschafter-Erbe unbeschränkte Haftung für Altschulden 734
  - haftungsrechtliche Bedenken 733 ff
  - Interesse der Eigengläubiger 742
  - Interesse der Mitgesellschafter 743
  - Interesse des Erben 739 f
  - Leitentscheidung zur Dauervollstreckung über einen Kommanditanteil 722
  - Nachlass als Haftungssubstrat schon vor seiner Teilung (§ 1975 BGB) dem Zugriff der Eigengläubiger des Erben entzogen 733
  - Rechtsprechung 722 ff
  - Sondererbfolge und Nachlasszugehörigkeit 726
  - Testamentsvollstrecker nicht befugt, die Haftsumme des Kommanditisten-Erben zu erhöhen 731
  - Vererblichkeit des Anteils 725
  - Voraussetzungen 724 ff
  - Zulässigkeitsfrage 719
  - Zustimmung der Mitgesellschafter 727
- Dauervollstreckung** 717 ff
- Department of Labor (DoL)** 753 f
- Donation-Based Crowdfunding** 436
- Eigenkapitalschöpfung**
  - Formstrenge 340 f
- Eigenkapitalschöpfung**
  - ideologisch determinierte Formalschranken der Kapitalaufnahme 339
  - Intransparenz der wahren Verwaltungsmacht 340
- Einheitsunternehmen**
  - Geschäftsführung in Einheitsunternehmen 156
  - Wettbewerbsfähigkeit 156
- Environmental, Social and (Corporate) Governance (ESG)** 772
  - Anti-ESG legislation in einigen US-Bundesstaaten 745
  - Auseinandersetzungen über ESG-Regulierung in den USA als Stabilisatoren und Katalysatoren transatlantischer Konfliktfelder 772
  - Diskrepanz zwischen der europäischen ESG-Politik und -Regelsetzung zur politischen Situation und gegenläufiger Normgebung in Amerika 758
  - Ende der Chevron-Doktrin 784
  - ESG in europäischer Corporate Governance 749

- ESG legislation und ausgewählte Aspekte 751
- ESG legislation in den USA 749
- europäische Marktteilnehmer im Visier aktivistischer Strategien von USstate attorney generals und Politikern 754f
- freiwillige ESG-Initiativen im Visier von state attorneys general 777ff
- ideologische Diskrepanzen zwischen USA und Europa 747f
- Investitionsentscheidungen bezogen auf monetär orientierte Ertragsersparungen 752ff
- Kampfplatz USA und transatlantische Konfliktfelder 780
- Loper Bright Enterprises 784
- Niedergang in USA 746f
- politischer Streitigkeiten in den USA 748
- erhebliche Gefahren für europäische Unternehmen durch Entwicklungen in den USA 758f
- Scheitern von ESG-proxy proposals 746
- Strategie für den Umgang mit US-Investoren 751
- transnationale Konfliktfelder 746ff
- Umwelt- und Klimaschutzregulierung in den USA 759ff
- Umweltschutzregulierung als Spiegelbild des Streits um die Bundeskompetenzen 767
- US-Investoren in Deutschland am Beispiel öffentlicher Pensionsfonds 750
- Verschlechterung von Finanzierungsbedingungen 756
- zunehmende ESG proxy proposals 746
- zunehmende regulierungspolitische Spaltung 745
- Erbrecht**
  - Kapitalschutz 735
- Ersetzungsbefugnis nach dem UmwG**
  - Ermittlung der Zahl der zusätzlich zu gewährenden Aktien 602
  - Festlegung im Verschmelzungsvertrag 601
- ESG-Initiativen**
  - Drohungen aus Amerika 748
- EU-Green-Bond-Standard**
  - Aufsicht 427
  - Dokumentation und Transparenz 426
  - Einordnung 424
  - Private Enforcement 428
  - Prospektpflicht 426
  - Public Enforcement 427
  - Taxonomiekonforme Verwendung der Nettoerlöse mit Flexibilisierungen 426

- EU-Nachhaltigkeitsrichtlinien** 186
- Europäische Kapitalmarktunion** 269
- Europäische Lieferkettenrichtlinie**
  - Gemeinwohlüter-Schutz in der Unternehmensgruppe 811ff
- Europäischer Finanzraum**
  - Environmental, Social und (Corporate) Governance (ESG) und die Gegenbewegung in Amerika 748ff
- Europäischer Finanzraum**
  - transnationale Konfliktfelder 749
- Europäisches Klimagesetz** 199
- European Green Deal**
  - Auseinandersetzungen über ESG-Regulierung in den USA 772
  - climate-change disclosure rules 773
  - diversen regulatorischen Initiativen der EU-Normsetzung 746
  - Gegenbewegung in USA 749ff
  - SEC-Regulierung zu klimabezogenen Publizitätspflichten 773ff
  - vom Konsens zur Spaltung in der Umwelt-schutzregulierung 768ff
- Familienunternehmen**
  - Mehrstimmrechte 348
  - Unternehmensfinanzierung 291
- Feststellung des Verschuldensgrades**
  - Abgrenzungsschwierigkeiten 10
  - Deep pocket theory 19
  - einfache Fahrlässigkeit 7
  - erforderliche Sorgfalt 7
  - gerichtliche Prüfung 9
  - grobe Fahrlässigkeit 7
  - hindsight bias 10
  - Justiz-Paradoxon 15
  - keine Bindung an Abschlussprüferaufsichtsstelle 15
  - keine Bindung an strafrechtliches Urteil 14
  - Leichtfertigkeit 11
  - Rückschauverzerrung 10
  - Sachverständigengutachten 13
- Financial Return Crowdfunding** 437
- Financial Statements Insurance** 30
- Finanzholding**
  - Befreiung von Schutzpflichten nach CSDDD 829
  - Corporate Sustainability Due Diligence Directive (CSDDD) 816ff
  - Gemeinwohlüter-Schutz 828
  - Gemeinwohlüter-Schutz in den Gruppen-Konstellationen 828
  - Pflichtenübertragung nach CSDDD 829

**Finanzmarktintegritätsstärkungsgesetz**

- Aspekte Neuregelungen aus anderen Ländern 39
- Ausdifferenzierung der Fahrlässigkeitshaftung 18
- cheapest cost avoider 26
- Entstehung 2
- Feststellung des Verschuldensgrades 6
- Haftungsobergrenzen 5
- Nachbesserung 37
- rechtspolitische Beurteilung 17
- Rückgriff auf die Rechtsfigur des Vertrages mit Schutzwirkung für Dritte 34
- Rückschauverzerrung bei Feststellung des Verschuldensgrades 10
- Schadensverlagerung 26
- Social cost spreading 26
- Vermögensschaden als soziale Kosten 26
- Vertrauensstärkung 3
- Ziele 3

**Finanzplatz**

- Intermediärsfunktion 274
- Notierungsdynamik 273
- Untergrenzen für Notierungszahlen 273

**Flexible Kapitalgesellschaft („FlexCo“)**

- Abstimmungen 506
- Anteilseinziehung 491
- Anteilsübertragung 489
- Aufsichtsratspflicht 507
- Auskunfts- und Informationsrecht 501
- Ausschlussklausel des § 12 Abs. 4 FlexKapGG 490
- Ausübung des Bezugsrechts 489
- Bilanzgewinn 497
- eigene Anteile 491
- erleichtert die Kapitalaufnahme durch hinzutretende Gesellschafter 487
- Finanzierung 486
- Finanzierungsformen 488
- genehmigten Kapital 488f
- Geschäftsanteil 487
- inhaltlichen Regelungen des FlexKapGG 486
- Kapitalerhöhung 488
- Kapitalerhöhungsbeschluss 490
- Kapitalherabsetzung 491
- Kapitalmaßnahmen 488
- Liquidationserlös 497
- Minderheitenrechte 500
- Prüfungs- und Belegungspflichten 490
- Stammeinlagen 487
- Stimmrechte 497f
- Stückanteile 487
- subsidiäre Anwendung des GmbHG 484

- über das Recht der GmbH hinausgehende Gestaltungsmöglichkeiten der Finanzierung 486
- Übernahme der Regelungen zur bedingten Kapitalerhöhung 488
- Übernahmeerklärungen im Zuge von Kapitalerhöhungen 489
- Umwandlung 507
- Unternehmenswert-Anteile 492ff
- Wert der Stammeinlage 487

**Gesellschaft**

- Außengesellschaft 549ff
- Befriedigungsprivileg der Gesellschafter gegenüber Privatgläubigern 796
- Begründung von Mehrstimmrechten 575
- Einschränkung des Grundsatzes der unbeschränkten gemeinschaftlichen Gesamtvermögenshaftung 789
- flexible Kapitalgesellschaft („FlexCo“) 482ff
- Gesellschaft mit gebundenem Vermögen 862ff
- Gesellschafterhaftung in der Personengesellschaftsinsolvenz 788ff
- Grundsatz der unbeschränkten gemeinschaftlichen Gesamtvermögenshaftung 789
- Herabsetzung der Kapitalmehrheit 149
- Innengesellschaft 549ff
- Jahresabschluss-Versicherung 31
- Klimaexpertise im Aufsichtsrat 216
- Klimaneutralität 205f
- ohne persönlichen Gewinnbezugsrechte 863
- Personengesellschafterhaftung als allgemeiner Gläubigerschutz 798
- Personengesellschafterhaftung als Bonitätsersatz für fehlenden Kapitalschutz 800
- Personengesellschafterhaftung als handelsrechtliche Besonderheit 799
- Personengesellschafterhaftung als Kehrseite von Privatherrschaft und Privatnützigkeit der Gesellschaftsführung 803
- Personengesellschafterhaftung als Korrelat der Rechtssubjektivität der Personengesellschaft 801
- Prinzip der gemeinschaftlichen Gesamtvermögenshaftung 797
- Rechtsdiskurs zur Personengesellschafterhaftung 804
- Say on climate der Hauptversammlung 217
- Schaffung von Mehrwert für die Gesellschaft 863
- Schutz des bevorrechtigten Gesellschafters 576
- Unternehmen als Fähigkeiten- und Wertefamilie 863

**Gesellschaft in Verantwortungseigentum**

- Stellung als Gesellschafter ohne Gewinnbezugsrechte 862 ff

**Gesellschaft mit gebundenem Vermögen (GmgV)**

- Aufspaltung der Herrschafts- und Gewinnbezugsrechte 882
- Einsatzmöglichkeiten 867
- Geschäftsführung durch aktive Gesellschafter 862
- gewinnbezugsloses Unternehmen 866
- Governance 881
- Grundlagen der Vermögensbildung 863
- Kontrolle durch Destinatäre und Stiftungsaufsicht 884 f
- Mitgliedschaftslogik, bei welcher die Rechtsposition der Gesellschafter weitgehend derjenigen in einem Verein oder einer Genossenschaft entspricht 865
- Qualifizierte Vermögensbindung 866
- Rechtsvergleich mit anderen Ländern 869 ff
- Rechtsvergleich mit Dänemark 870
- Rechtsvergleich mit Österreich 8875
- rechtsvergleichende Bestandsaufnahme 869 ff
- Reformimpulse für Deutschland 891
- Tätigkeitsvergütung der Gesellschafter 862
- Treuhänderisches Unternehmertum 863
- Unternehmensgründung 869
- Unternehmensnachfolge 867
- Unternehmensstiftung in Dänemark 870 f
- Unternehmensstiftung in Österreich 875 f
- Unternehmensträger mit eigener Rechtspersönlichkeit 864
- Vergleich mit Stiftung 864
- Verwirklichung der Unternehmensbindung in einer handelsrechtlichen Rechtsform 892

**Gesellschafter**

- Haftungsumfang der Personengesellschafter nach Eröffnung eines Insolvenzverfahrens 788 ff
- Vereinbarung zu Russian-Roulette-Klauseln 938

**Gesellschaftsrecht**

- Ausstiegsmechanismus für Gesellschafter 934
- Auswirkungen der Klimapolitik 180 ff
- Benefit Corporation in den USA 195
- Buy-Sell-Vereinbarungen 935
- Corporate Sustainability Due Diligence Directive 201
- Deterrent Approach 938
- EU-Nachhaltigkeitsrichtlinien 186

- Exit-Optionen und Abfindungsvereinbarungen Überprüfung 935
- Gesellschaft in Verantwortungseigentum 862 ff
- gesellschaftspolitische Ziele 186
- Greenhouse Gas Protocols 204
- Greening Corporate Law 207 ff
- Innengesellschaft 549 ff
- internationale und europäische Entwicklung im Klimaschutz 194 ff
- Katalysator der Gesellschaftspolitik 186 f
- Klimaberichtspflichten 188 ff
- Klimaberichtspflichten nach ARUG II 192
- Klimabilanzierungsstandard 204
- Klimaeinstufungspflichten nach der Taxonomie-VO 190
- klimafreundliche Instrumente 183
- Klimainformationspflichten nach der Offenlegungs-VO 191
- Klimaleitungs- und Sorgfaltspflichten 192 f
- Klimaneutralität als Zielvorgabe des deutschen Öffentlichen Rechts 199 f
- Klimaneutralität als Zielvorgabe des EU-Klimagesetzes 199
- Klimaneutralität als Zielvorgabe des Europäischen Gesellschaftsrechts 200
- Klimaquote 208 ff
- Klimatiras 207 ff
- Klimatransformationsplan 209
- Klimatransparenzpflichten 190 ff
- Klimavergütung 189 f
- Offenlegungs-Verordnung 191
- organisationsrechtliche CSDDD-Impulse 857
- Rechtsformzusätze mit Klimabezug 194 ff
- reibungslose Beendigung der Zusammenarbeit durch Übertragung der Anteile eines Gesellschafters 936
- Russian-Roulette-Klauseln 933 ff
- Sale Shoot-Out 938
- Satzungsklausel klimaneutral 212
- Société à Mission 195
- Taxonomie-Verordnung 190
- Texan Shoot-Out 938
- Transformative Normierung des CSDDD in Deutschland 850
- treuhänderisches“ Unternehmertum, bei dem die gesamte Wertschöpfung alleine dem Unternehmen zu steht 863
- Unternehmensträger mit Vermögensbindung 862 ff
- Vorsorge gegen eine spätere Selbstblockade (deadlock) 934

**Gesetz zur Stärkung der Finanzmarktintegrität 1 ff****Golden shares**

- Goldene Aktionen 94

**Green Bond Principles 412****Green Bonds**

- Arten 410
- Ausprägung der Sustainable Finance 410
- Begriff 410
- Chinas Green Bond Principles 422
- Entwicklung 412
- international 422
- Interpretationsspielraum 415
- Nachemissionsprüfung 419
- ökonomische Forschung 413
- second-party opinion (SPO) 420
- staatliche und halbstaatliche Standards 422
- Transition Bonds 411
- Voremissionsprüfung 419

**Green Finance 190 ff**

- Aufsicht 427
- Dokumentation und Transparenz 426
- Ecolabel-VO 408
- EU-Green-Bond-Standard 424 ff
- europäische langfristige Investmentfonds (ELTIF) 407
- Green Bonds 410
- Green Loans 411
- greenbleaching 409
- Greening neutraler Rechtsakte 404
- Greenwashing-Kritik 409
- grüne Produktstandards 407 f
- grünes ELTIF-Label 407
- Nachhaltigkeitsberichterstattungs-RL 402 ff
- Offenlegungs-VO 402 ff
- Private Enforcement 428
- Prospektpflicht 426
- Prospekt-VO 404
- Public Enforcement 427
- Rechtslandschaft 419
- Risikomanagement 405
- Sustainability-linked loans 411
- Taxonomiekonforme Verwendung der Nettoerlöse mit Flexibilisierungen 426
- Taxonomien und Taxonomievergleich 423
- Taxonomie-VO 402 ff
- Überblick 399
- unionale Rechtsrahmen 400

**Green Loans 411****Green-Bond-Fonds 412****Green-Bond-Indizes 412****Green-Bond-Standard 412, 419****Greening Corporate Law 207 ff****Greenium 413****Grundsätze ordnungsmäßiger Abschlussprüfung (GOA) 16****Haftpfllichtprozess**

- Justiz-Paradoxon 15
- offene Regelungsbereiche 16
- Problem der unbestimmten Rechtsbegriffe 16

**Hauptversammlung**

- Say on climate der Hauptversammlung 217

**Hybridanleihen**

- Anrechnung von Hybridanleihen als Eigenkapital 460
- AT1-Kapitalinstrumente 459
- Aufschlag auf die Marge (step up) 463
- Ausschüttungsflexibilität 459
- Einseitige Belastung ohne ausreichende Kompensation 475
- Flexibilität der Zinszahlungen 466, 469
- Gläubigerkündigungsrechte 463
- hinreichende Verlustabsorption 476
- inhaltlich keine gesetzliche Regulierung 459
- inhaltliche Ausgestaltung 459
- isolierten“ vertraglichen Herabschreibung 474
- praktische Bedeutung 458
- Prinzip der Permanenz 461
- Ratingkriterien 463
- Rückzahlungsereignisse 463
- Unternehmenshybridanleihen 459
- Verhaltensfehlsteuerung 475
- Verlustabsorption 473
- Zinsaufschubmöglichkeit mit Nachzahlungspflicht 459

**Insolvenz**

- Personengesellschaftsinsolvenz 788 ff

**Insolvenzverwalter**

- Prozessstandschaft nach § 93 InsO 788 ff

**International Standards of Auditing (ISA) 16****Jahresabschluss-Versicherung 30****Kapitalerhöhung**

- „Quick-to-Market“ Transaktionen 367
- 10 %-Kapitalerhöhungen 358
- Bedeutung 357
- Bezugsrechtsemissionen 362 ff
- Desiderata 360
- deutsche Transaktionspraxis 357
- Direktbeschluss der Hauptversammlung 371 ff
- Ermächtigungsbeschlüsse 363
- Gleichbehandlungsgrundsatz 370 ff
- Hyrcan-Rechtsprechung 370
- Kriterium bei der Entscheidung über die Rechtsform 357

- maximale Volumen für Kapitalerhöhungen mit erleichtertem Bezugsrechtsausschluss 366
- mit erleichtertem Bezugsrechtsausschluss 366
- Nutzung von genehmigtem Kapital 362 ff
- Platzierung bei individuellem Investor 370
- prospektfreie Platzierung 369
- rechtlicher Rahmen 358
- Rechtsschutzmöglichkeiten der außenstehenden Aktionäre 372 ff
- Sachkapitalerhöhungen 374 ff
- Take out-Barkapitalerhöhung 358
- Vorschläge für Flexibilisierung 360
- Zukunftsfinanzierungsgesetz 361

### **Kapitalgesellschaft**

- flexible 482 ff

### **Kapitalmarkt**

- Abwanderung in andere Kapitalmärkte 295
- Auslandsnotierungen 272
- Beteiligungskapital für junge Unternehmen 269
- Delistings 270 f
- Eigenkapitalunterlegung 268
- Entstehung des amerikanischen Kapitalmarkts 309 f
- europäische Überregulierung 296
- financial literacy 312
- Finanzierungssysteme im Bereich des Private Equity 272 f
- Green Bonds 267
- Green Finance 399 f
- greenbleaching 409
- Green-Bonds-Segmente von Börsen 421
- Grüne Produktstandards 407 f
- institutionelle Reform 314 f
- Intermediärsfunktion der Börse 274
- Kapitalanlageseite 311
- Mobilisierung privaten Anlagekapitals 313
- Nachhaltigkeitspräferenzen bei der Anlageberatung 404
- Notierungsdynamik 269 f
- Private-Equity-Fond 272
- Product Governance 404
- professionellen Kapitalmarktintermediäre 312
- Rückgang bei den Notierungszahlen 269 f
- staatliche Förderbanken und Fonds 312
- Stärkung vorhandenen Anlagekapitals 311
- Steigenden Corporate Governance Anforderungen 296
- Sustainability-Linked Loans 267
- Timewashing 268

### **Klimagovernance**

- Klimaexpertise im Aufsichtsrat 216

### **Klimaneutralität** 202

#### **Klimaquote**

- Anwendungsbereich 211
- Gegenstand 209
- Klimatransformationsplan 209
- Konzeption 208
- Orientierung am Regelungsvorbild des § 76 Abs. 4 AktG 209

### **Klimaschutz**

- Aktivierung der Unternehmen durch Gesetzgeber 181
- Corporate climate enforcement 183 ff
- Corporate climate responsibility 185 ff
- Corporate Sustainability Due Diligence Directive (CSDDD-Entwurf) 182
- Corporate Sustainability Reporting Directive (CSRD) 182
- de lege lata im Gesellschaftsrecht 183, 188
- European Sustainability Reporting Standards (ESRS) 200
- gesellschaftsrechtlichen Instrumenten 182
- internationale und europäische Entwicklung 194 ff
- Klimaberichtspflichten 188 ff
- Klimaberichtspflichten nach ARUG II 192
- Klimateinstufungspflichten nach der Taxonomie-VO 190
- Klimainformationspflichten nach der Offenlegungs-VO 191
- Klimaleitungs- und Sorgfaltspflichten 192 f
- klimaneutrale Unternehmen 202
- Klimaneutralität als Zielvorgabe des deutschen Öffentlichen Rechts 199 f
- Klimaneutralität als Zielvorgabe des EU-Klimagesetzes 199
- Klimaneutralität als Zielvorgabe des Europäischen Gesellschaftsrechts 200
- Klimaquote 208 ff
- Klimaessorts auf Leitungsebene 197
- Klimatransformationsplan 209
- Klimatransparenzpflichten 190 ff
- Klimavergütung 189 f
- Treibhausgasneutralität 206

### **Klimaschutzregulierung** 749 ff

#### **Konzern**

- geschäftsleitende Holding 820
- Differenzierungen der Übernahme-Ermächtigungen innerhalb der Gruppe 842 f
- Einbeziehung des Gemeinwohlgefährdungs- in die Unternehmenspolitik 857
- Einheitsunternehmen 156

- Einstandspflichten der Tochter 843
  - Erfüllungsübernahme nach Art. 6 CSDDD 827
  - Erfüllungsübernahme und Schutzpflichten der Tochter 845 ff
  - Ergebnisse zur TochterGmbH unter der CSDDD 855
  - Ermächtigung zur Erfüllungsübernahme 834
  - erweiterte Pflichtenprogramm der Mutter-geschäftsleitung 826
  - Funktionsfähigkeit des Tochter-Schutzsystems 824
  - Gemeinwohlüter-Schutz in den Gruppen-Konstellationen 816
  - Genuin unternehmensleitende Schutzmaßnahmen 836
  - Gesamt- oder Einzelübernahme von Schutzmaßnahmen 842
  - Geschäftsführung in Einheitsunternehmen 156
  - Gesellschafts-interne Entscheidungszuständigkeiten beim Abschluss der Übernahmevereinbarung 849
  - Grenze beim CSDDD-Gemeinwohlüter-Schutz 849
  - gruppenspezifisches in der CSDDD 813
  - Inhalt der Übernahmevereinbarung 851
  - Klimaplan 840
  - Kontroll- und Steuerungspflichten der Tochtergeschäftsleitung 844
  - Kontrolle der Übernahmevereinbarung 851
  - konzernrechtliche Impulse aus dem Unionsrecht 860
  - Möglichkeit beherrschender Einflussnahmen 814 f
  - Mutter als Erfüllungsgehilfin der Tochter 844
  - organisationsrechtliche CSDDD-Impulse 857
  - Pflichtenübertragung von der Mutter auf die Tochter 825
  - Quellen-naher Güterschutz 820
  - Rechtssicherheit hinsichtlich der Organpflichten im Konzern 157
  - Residualpflicht 823
  - Restpflichten der Tochtergeschäftsleitungen 818
  - Richtlinie zur nachhaltigen Unternehmensführung 812
  - Risikomanagementsysteme der Tochter zum Schutze der Gemeinwohlüter in ihrem Aktivitätsbereich 846
  - Schutz der Gemeinwohlüter im Aktivitätsbereich der Tochter 846
  - Schutz der Gemeinwohlüter im Konzern 812
  - Schutz im Tochterbereich unter einer originär schutzpflichtigen Mutter 826
  - Schutzpflichten 812 ff
  - schutzpflichtige Gruppenmutter 819
  - Schutzpflichtige und nicht schutzpflichtige Töchter 824
  - schutzpflichtige Unternehmensgruppe 816
  - schutzpflicht-Verlagerung zu den Töchtern 831
  - Schutzpolitik und Umsetzungsstrategie bei Übernahme des Gemeinwohlüter-Schutzes 836 f
  - Schutzpolitik und Vorsorge in der TochterAG und -GmbH 839
  - Töchter schutzpflichtig für ihren jeweiligen Aktivitätsbereich schutzpflichtig 821
  - Tochterimpulse für die Muttersysteme 827
  - Übernahme-Vereinbarung 848
  - Übertragung der Schutzpflichten auf an sich schutzpflichtfreie Töchter 830
  - Unterstützung zur CSDDD auf der Gruppenebene 833 ff
  - Verlagerungs-Ermächtigung im Transformationsgesetz 831
  - verstärkende Absicherung der Tochterssysteme 822
  - vom Schutz- zum Konzernorganisationsrecht 857 ff
  - Wettbewerbsfähigkeit 156
  - Ziele der Erfüllungs-Ermächtigung 840
  - zivilrechtliche Haftung der Tochter trotz Erfüllungsübernahme 848
  - Zusätzliche Verantwortlichkeit der Holding 821
- Konzernrecht**
- Reformvorschlag 155 ff
- Mehrstimmrechte**
- auf Zeit 334
  - ausgenommene Beschlussgegenstände 327
  - Berechtigte kann Versprechen, aufgrund dessen ihm die Sonderrechte zugestanden wurden, nicht mehr einhalten 330
  - Beschränkung des maximalen Stimmgewichts 584
  - betroffene Gesellschaften 331
  - Eigenkapitalschöpfung und Mehrstimmrechte 339 f
  - Einführung im Zuge des Formwechsels 591
  - Einführung, Veränderung, Erlöschen 331
  - Erbfall 338



- Formstrenge 340f
- Funktionen 328
- Gegenstand der multiplen Stimmrechte 332
- Grundarten 326
- Grundgefahren 330
- individuelles Zustimmungserfordernis 587
- Inhalts- und Zeitgrenzen von Stimmprivilegien 336
- Instrumente zum Inhaberschutz 582
- Instrumente zum Schutz der nicht-begünstigten Anteilsinhaber 589
- Intransparenz der wahren Verwaltungsmacht 340
- Mehrstimmrechtsbefugnisse und Umstandsänderungen 345
- Mischbezugsrecht 343
- Namensaktien 331
- Rechte für privat-wertsteigernde Projekte 330
- Rechtsfortschreibung von Mehrstimmrechten 579
- rechtsgeschäftliche Übertragung 338
- Schrankentrias 333
- Schutz des bevorrechtigten Gesellschafters 576
- Schutzkonzept zugunsten der Inhaber von Stammaktien 574
- schwache 326
- starke 326f
- strengen Schutzgarantien 333
- sunset clauses 337
- Überproportionale Stimmkraft beim Formwechselbeschluss 582ff
- Veränderung der rechtlichen Ausgestaltung 585
- Verfall 334f
- Verfall der besonderen Stimmrechtsbefugnis 332
- Verfallsfristen 337
- Verlust durch Übertragung 338
- Verschiebung des Kräfteverhältnis von Mehrheit und Minderheit 330
- Verwässerung 343
- Wechsel der Normsysteme 580
- Mehrstimmrechtsaktien**
  - Agency-Kosten 281
  - aktien- und kapitalmarktrechtliche Folge-regelungen 145
  - Aktionärsbindung 135
  - Aktionärsbindung der Mehrstimmrechtsaktien 135ff
  - Aktionärsschutzes 344
  - als Namensaktien 126
  - Alternative zu den börsentauglichen Rechtsformen 125
  - Alternative zur Treueaktie 124
  - Alternativen im Aktienrecht 125
  - Auseinanderfallen von Stimmrecht und Aktienbesitz 109
  - Ausübung des Mehrstimmrechts 130ff
  - Auswirkungen auf Überwachung und Corporate Governance 145ff
  - automatische Verlängerung 141ff
  - Begrenzung des Stimmgewichts 130
  - Beschränkungen 281
  - Börsengang 112
  - Börsensegment 127
  - börsliche Positionierung 123
  - decoupling 109
  - Diskussion 86
  - Einfluss der Inhaber 109f
  - Einführung durch Satzungsbeschluss 140
  - Eintrag ins Handelsregister 144
  - empirische Evidenz 282f
  - Erkennbarkeit des Besitzes 126
  - erleichterten Eigenkapitalschöpfung für junge Wachstumsunternehmen 321ff
  - Erlöschen des Mehrstimmrechts 135
  - Erschwerung durch Satzungsbeschluss 143
  - EU Listing Act 303
  - Europäische Entwicklungen 93ff
  - Evidenz aus der Entrepreneurship-Forschung 282
  - Folgen einer Spaltung einer AG 150
  - Folgen einer Verschmelzung einer AG 150
  - Folgen für das Übernahmerecht 147
  - geschichtliche Entwicklung 87
  - Grenzen 118ff
  - Grenzen des Mehrstimmrechts 131ff
  - Grenzen und Schutzvorschriften bei börsennotierten Gesellschaften 126ff
  - historische Entwicklungen in Deutschland und Österreich 106ff
  - Kapitalerhöhung unter Berücksichtigung von Mehrstimmrechtsaktien 147ff
  - Koalitionsvertrag 87
  - Kontrollposition durch Mehrstimmrechte 110f
  - Kontrollverlust der Unternehmen 112
  - Länder mit grundsätzlicher Zulassung, aber Grenzen 103
  - Länder mit Treuestimmrechten 100ff
  - Länder mit Verbot bei Börsennotierung 102
  - Länder mit weitgehender Ablehnung 102
  - Länder mit weitgehender Zulassung 96ff
  - Mehrstimmrechtsfaktor 92
  - Minderheitenschutz 146



- Mindestaktienbesitz 129
- Offenlegung 143 f
- ökonomische Gründe 108 ff
- ökonomische Gründe für die Einführung 278 f
- ökonomische Gründe gegen die Einführung 282 f
- ökonomische Vorteilhaftigkeitsüberlegungen 280
- optionale Grenzen 91
- persönliche Voraussetzungen des Aktionärs 128
- Privatautonomie 115
- rechtsgeschäftlichen Übertragung 138
- rechtsvergleichende Erfahrung 96 ff
- relevanter Markt 127
- Richtlinienvorschlag der Europäischen Kommission 89 ff
- Satzungsfreiheit 115
- Schrankentrias 333
- Schutzvorschriften 118 ff
- Stand der empirischen Forschung 116
- Stellungnahmen von institutionellen Investoren 121
- Stellungnahmen von Stimmrechtsberatern 121
- Stimmgewichtung 127
- Sunset clauses 91, 135
- Teil des Freiverkehrs der Frankfurter Wertpapierbörse 127
- transfer-based sunset clause 137
- Transparenz 143 ff
- übernahmerechtliche Auswirkungen 120
- Übersicht über Regelungen in der EU 154
- Übertragung von Todes wegen 137
- Übertragungsbegrenzung 137
- Unabhängigkeit von Aufsichtsratsmitgliedern 146
- Uplisting in den regulierten Markt 139
- Vereinbarkeit mit Niederlassungs- und Kapitalverkehrsfreiheit 94
- Verfallsklausel 139
- Vergleich geplanten Regelungen in Italien, Frankreich 105 f
- Vergleich mit Frankreich, Belgien, Spanien, Italien 100
- Vergleich mit Großbritannien 103 f
- Vergleich mit Niederlanden 98
- Vergleich mit Österreich, Griechenland, Bulgarien, Kroatien 103
- Vergleich mit Schweiz 99
- Vergleich mit skandinavischen Ländern der EU 98
- Vergleich mit Slowakei, Bulgarien, Polen, Luxemburg 102
- Vergleich mit USA 96
- Wert des Bezugsrechts 149
- Wettbewerbsfähigkeit der Unternehmen 115
- Wiedereinführung 280 ff
- zeitliche Begrenzung 135 ff
- Zeitpunkt der Zulassung 127
- Zulassung 85
- Zulassungsgründe 108 ff
- zwingende Grenzen 90
- Mehrstimmrechtsaktionär** 109 ff
  - Treuepflicht gegenüber der Gesellschaft 145
  - Übertragung von Todes wegen 137
  - Übertragungsbegrenzung 137
  - Veräußerung ihr Mehrstimmrecht 137
  - zeitliche Verlängerung 140
- Minderheitenschutz**
  - Mehrstimmrechtsaktien 146
- Mittelstand**
  - Börsennotierung 291
- Nacherwerb**
  - Preisthematik 641
  - rechtsökonomischen Beurteilungen 646
  - Rechtsvergleich mit anderen Ländern 642
  - rechtsvergleichender Ertrag 645
- Nachhaltigkeitsberichterstattungs-RL** 402 ff
- Offenlegungs-Verordnung** 191
- Offenlegungs-VO**
  - Nachhaltigkeitsrisiken und -belange 402
- Öffentlichen Übernahmen**
  - Abkauf der Restminderheit gegen eine Abfindung (back end) 647
  - Arbitrageziele 658
  - Bieterfolgen 659
  - Erwerb der Kontrollmehrheit (front end) 647
  - Grundsatz zur Bestimmung der Gegenleistungshöhe 639
  - Irrevocable Commitment als einem Erwerb gleichgestellte Vereinbarung i. S. d. § 31 Abs. 6 Satz 1 WpÜG 649
  - kein Anspruchsausschluss für das Irrevocable Commitment gemäß § 31 Abs. 6 Satz 1, Abs. 5 Satz 2 Fall 1 WpÜG 653
  - Nacherwerb 641 ff
  - Preisthematik 638
  - rechtsökonomischen Beurteilungen 646
  - rechtsvergleichender Blickwinkel für Nacherwerbe und gleichgestellte Vereinbarungen 642
  - rechtsvergleichender Ertrag 645
  - Regulatorik 659

- Umgehung der gesetzlichen Preisregelungen zum Vor-, Parallel- oder Nacherwerb 638
- Umgehung der Mindestpreisregelung 656
- Umgehungsschutz 657
- zweistufigen Prozess 647

**one share one vote-Prinzip** 87, 89

### **Österreich**

- flexible Kapitalgesellschaft („FlexCo“) 482 ff

### **Personengesellschafterhaftung**

- Herleitung der Gesellschafterhaftung aus dem Fehlen einer gesetzlichen Ausnahme 805
- Kosten des Insolvenzverfahrens als Gesellschafts- und Gesellschafterschuld 805
- Personengesellschafterhaftung als allgemeiner Gläubigerschutz 798
- Personengesellschafterhaftung als Bonitätsersatz für fehlenden Kapitalschutz 800
- Personengesellschafterhaftung als handelsrechtliche Besonderheit 799
- Personengesellschafterhaftung als Kehrseite von Privatherrschaft und Privatnützigkeit der Gesellschaftsführung 803
- Personengesellschafterhaftung als Korrelat der Rechtssubjektivität der Personengesellschaft 801
- Prinzip der gemeinschaftlichen Gesamtvermögenshaftung 797
- Rechtsdiskurs zur Personengesellschafterhaftung 804

### **Personengesellschaftsinsolvenz**

- § 93 InsO lediglich eine Nachbildung und Verallgemeinerung des § 171 Abs. 2 HGB für Gesellschafteraußenhaftung 794
- § 93 InsO wortlaut- und sinntypischprechend von der wirksamen Beteiligung am Insolvenzverfahren gegen die Gesellschaft entkoppelt 796
- § 93 InsO zwischen Durchsetzungsbündelung und Durchsetzungsausschluss 793
- Befriedigungsprivileg der Gesellschafter gegenüber Privatgläubigern 796
- Beschränkung der Beitreibungsbefugnis des Insolvenzverwalters 794
- Einziehungsmacht nach § 93 InsO nur für ordnungsgemäß angemeldete Insolvenzforderungen 791 f
- Ermächtigung des Insolvenzverwalters spiegelt Sperrwirkung 794
- für Neuverbindlichkeiten hafte allgemein nur die Insolvenzmasse 789
- gemeinschaftlichen Gesamtvermögenshaftung 788 ff
- Gesellschafterhaftung 788 ff

- Gesellschafterhaftung für die Kosten des Insolvenzverfahrens 789
- Haftungsumfang der Personengesellschafter nach Eröffnung eines Insolvenzverfahrens 788 ff
- kein verlängertes Befriedigungsprivileg vorrangiger Gesellschaftsgläubiger jenseits des Gesellschaftsvermögens 795
- keine Ermächtigungswirkung hinsichtlich nicht angemeldeter Forderungen 794
- Kosten des Insolvenzverfahrens 789
- Kosten des Insolvenzverfahrens als Gesellschafts- und Gesellschafterschuld 805
- Kosten des Insolvenzverfahrens als Neuverbindlichkeit 789
- mittelbaren Stellvertretungsbefugnis des Insolvenzverwalters 789
- Prinzip der gemeinschaftlichen Gesamtvermögenshaftung 797
- privative gesetzliche Prozessstandschaft. 793
- Prozessstandschaft des Insolvenzverwalters 788 ff
- Sperrwirkung für nachrangige, unaufgeforderte Gläubiger 796

### **Private Ordering** 31

### **Publizität des Handelsregisters**

- negative 662 ff

### **Reasonable Belief-Test** 74

### **Reformmaßnahmen zur Klimatransformation**

- Klimagovernance 216 ff

### **Reformmaßnahmen zur Klimatransformation**

- Klimaquote 208 ff
- Rechtsformzusatz „klimaneutral“ 212 ff

### **Reformvorschlag Aktienkonzern**

- abhängige und herrschendes Unternehmen 161
- allgemeinen Verhaltensstandards 168
- Aufgabenverteilung unter den Gesellschaften 166 ff
- Ausübung des Weisungsrechts 171
- Berichtspflichten 176 f
- Durchbrechung der Risiko- und Haftungssegmentierung im Konzern 161
- eigenverantwortliche und weisungsfreie Leitung der Tochter 166
- Eigenverantwortlichkeit des Tochtervorstands 174 f
- Einflusssschranken 173
- Eingliederung 178 ff
- Handlungs- und Pflichtenprogramm 170
- Handlungs- und Pflichtenprogramm seiner Geschäftsleitung 163

- Informationen des Konzernstrukturberichts 179 ff
- konzerninternen Informationsaustausch 169
- konzerninternes Controlling 168
- Konzernorganisationsfreiheit 162
- Konzernverbindung über die personelle Organbesetzung 163
- Leitung der Aktiengesellschaft 164 ff
- Leitungsauftrag aus § 311 AktG 175 f
- Leitungsmacht 171
- Organisation 165 ff
- Prüfung durch den Abschlussprüfer 177 f
- qualifizierten Außenseiterschutz 166 f
- Risiko- und Haftungssegmentierung 160
- Sorgfaltspflicht und Verantwortlichkeit der Vorstandsmitglieder 166 f
- Verantwortlichkeit der Verwaltungsmitglieder der Gesellschaft 172
- Verlustübernahme 170
- Wegfall der Eingliederung 162, 178 ff
- Wesen der Aktiengesellschaft 159
- Registerpublizität**
  - ausschließlich positive Kenntnis als immanente Grenze 667
  - extrinsischer Grenze der Publizitätswirkungen 667
  - hypothetische (Register-)Rechtslage als extrinsische Grenze des Rechtsscheinbestands 672
  - Kenntnis des Dritten von eintragungspflichtigen Tatsachen als immanenter Grenze 667
  - kollisionsrechtliches Pendant des Doppelcharakters der Publizitätswirkungen 674 ff
  - mögliche Kenntnis der Beklagten des Abberufungsbeschlusses 665
  - Nachforschungspflichten 665
  - negative 662 ff
  - Vertrauensschutz des § 15 Abs. 1 HGB 665
- Richtlinie zur nachhaltigen Unternehmensführung (CSDDD)**
  - Gemeinwohlüter-Schutz in der Unternehmensgruppe 811 ff
- Richtlinienvorschlag der Europäischen Kommission vom 7. 12. 2022 89 ff**
- Römisches Recht**
  - societas 551 ff
- Russian-Roulette-Klauseln 933 ff**
  - angemessener Wert der Beteiligung 953
  - Auffächerung der Missbrauchsmöglichkeiten 946
  - außerstatutarische Vereinbarung 938
  - Ausübungskontrolle nach § 242 BGB 946
  - Begriff und Bedeutung 936
  - Beurteilung nach deutschem Recht 941
  - Beurteilung nach italienischem Recht 948
  - Effizienz 940
  - Einfluss des MoPeG 946
  - Fairness 940
  - Gesellschaftervereinbarung 938
  - Grobes Missverhältnis zwischen Abfindung und wahrem Anteilswert? 943
  - jüngste Entwicklung in Deutschland 946
  - jüngste Entwicklung in Italien 955
  - kleine Rolle der rechtsvergleichenden Argumente in Deutschland 957
  - Nachteile 940
  - Nachträgliche Ausübungs- und Missbrauchskontrolle gemäß § 242 BGB 944
  - Nebenvereinbarung 938
  - parallele zu sittenwidrigen Hinauskündigungsklauseln? 942
  - rechtsökonomische Würdigung 939
  - rechtstatsächliche Verbreitung 941
  - Regelung in Satzung 938
  - reine Wollensbedingung und Bestimmtheit des Vertragsgegenstandes 951
  - Schrifttum in Deutschland 941
  - Schrifttum in Italien 955
  - „anti-stallo“-Klauseln in italienischen Vertragswerken 948
  - unzulässige Einschränkung des außerordentlichen Kündigungs- oder Austrittsrechts 943
  - Urteil des italienischen Kassationshofs von 2023 948
  - Urteil des LG Mailand von 2024 955
  - Urteile in Deutschland 945
  - Urteile in Italien 948, 955
  - Verbot der leoninischen Abrede gemäß Art. 2265 C.c 952
  - Vorteile 939
  - zweistufige Grundstruktur 937
- Sachkapitalerhöhungen**
  - Ausnutzung genehmigten Kapitals 384
  - Barausgleichsanspruch 382
  - Berechnung des Umtauschverhältnisses 375 f
  - Berechnung des Umtauschverhältnisses 385
  - Bewertungsschwierigkeiten, 374
  - Direktbeschluss der Hauptversammlung 374
  - erforderliche Mehrheit 374
  - pflichtgemäßen Ermessen des Vorstandes 380
  - Rechtsschutzmöglichkeiten der außenstehenden Aktionäre 381
  - Volumen 375

- zulässige Abschlag vom Börsenkurs 379
- zur Umsetzung von Unternehmenszusammenschlüssen 374

**Safe Harbor**

- Audit Judgment Rule 56

**Say on Climate** 197**Schwarmfinanzierung**

- siehe auch Crowdfunding 431 ff

**Schwarmfinanzierungsverordnung (ECSP-VO)** 432**Societas des klassischen römischen Rechts** 551**Société à Mission** 195**Sonderprüfer** 226

- Aktienrecht 220 ff

**STADA-Entscheidung** 637 ff

- Arbitragefolgen und -strategien 658
- Sachverhalt 648
- übernahmerechtliche sowie -praktische Auswirkungen 654

**Stiftung**

- als Instrument der Unternehmensnachfolge 402 ff, 867
- Aufspaltung der Herrschafts- und Gewinnbezugsrechte 882
- bei Unternehmensgründung 869
- Kontrolle durch Destinatäre und Stiftungsaufsicht 884 f
- Rechtsträger mit Vermögensbindung 867
- Reformimpulse 891
- Unternehmensstiftung in Dänemark 870 f
- Unternehmensstiftung in Deutschland 879 f
- Unternehmensstiftung in Österreich 875 f
- Vergleich mit Unternehmensträger mit Vermögensbindung 864
- Verwirklichung der Unternehmensbindung in einer handelsrechtlichen Rechtsform 892

**Stiftung Verantwortungseigentum** 863**Sunset clause**

- transfer-based sunset clause

**Taxonomie-Verordnung** 190**Testament**

- Abwicklungsvollstreckung 721
- Dauertestamentsvollstreckung 717 ff
- Dauervollstreckung 721
- Formen der Testamentsvollstreckung 721
- Verwaltungsvollstreckung 721

**Testamentsvollstrecker**

- Dauertestamentsvollstreckung über Anteile eines persönlich haftenden Gesellschafters 718

**Texan Shoot-Out** 938**Timewashing** 268**Treueaktie**

- Alternative zur Mehrstimmrechtsaktie 124

**Übernahmerecht**

- Gegenleistung bei einer dem Erwerb gleichgestellten Vereinbarung 637 ff

**Umwandlungsrecht**

- Aktiengewährungsanspruch der anspruchsberechtigten Aktionäre sein 597
- Anfechtungsausschluss für Bewertungsrügen 600
- angemessenes Umtauschverhältnis durch Gewährung zusätzlicher Aktien 601
- Anreize für GmbHs 577
- Anspruch auf bare Zuzahlung aufgrund qualitativer Schlechterstellung 583
- Anspruch auf zusätzliche Aktiengewährung nicht sacheinlagefähig 596
- Beeinträchtigung von Sonderrechten 576
- Beschaffung der zusätzlich zu gewährenden Aktien durch Kapitalerhöhung 604
- den Anspruch der Aktionäre auf bare Zuzahlung als Gegenstand der Sacheinlage 606
- Einführung von Mehrstimmrechtsaktien im Zuge des Formwechsels 591
- Einlagegegenstand 605
- Ersetzungsbefugnis 597, 600
- Erweiterung des Anwendungsbereichs des Spruchverfahrens 597
- Formwechsel in eine Aktiengesellschaft 577
- Inhalt der Ersetzungsbefugnis nach § 72a UmwG 599 f
- innerstaatliche Umwandlung 597
- Kapitalerhöhung aus Gesellschaftsmitteln unter Ausschluss des Bezugsrechts 612
- Kapitalerhöhung gegen Sacheinlage 604
- Kontinuität der Rechtsverfassung 574
- Kontinuität der Vermögenszuordnung 574
- Offenlegungspflicht 589
- Rechtsfortbildung der Aktiengewährung 633 ff
- Rechtsfortschreibung der Mehrstimmrechte in der Aktiengesellschaft 590
- Sacheinlagefähigkeit des Aktiengewährungsanspruchs 605
- Sachkapitalerhöhung 604
- Schaffung der sog. Ersetzungsbefugnis 597
- Schaffung von Mehrstimmrechten 574
- Schonung der Liquidität des übernehmenden Rechtsträgers 601
- Schutz der Inhaber von Mehrstimmrechten 574

- Schutz des bevorrechtigten Gesellschafters 576
- überproportionale Stimmkraft beim Formwechselbeschluss 582 ff
- Übertragung der angeblichen Sacheinlage an die Gesellschaft 611
- Unangemessenheit festgelegten Umtauschverhältnisses 597
- Vermögensidentität nach Formwechsel 578
- Verschmelzungs- oder Spaltungsvertrag 596
- Vorschlag an den Gesetzgeber zur Aktiengewährung 633 ff
- Wechsel der Normsysteme 579
- Werthaltigkeit der Sacheinlage 608
- Zielsetzung der Reform 599 f

#### **Umwandlungsrichtlinie (RL (EU) 2019/2121) 597**

##### **Umwandlungsvertrag**

- Abgrenzung zwischen schuldrechtlichen und korporationsrechtlichen Regelungen 712
- Abgrenzungsfragen 712 ff
- Anwendungsbereich der sogenannten Andeutungstheorie 696 f
- Aufsichtsratsfall 698
- Auslegung 692 ff
- Auslegung an Individualverträgen orientiert 707
- Auslegung auf im Vertrag nicht in Bezug genommene Nebenabreden 693 f
- Auslegung der Urkunde 699
- Auslegung des Spaltungsplans 698
- Auslegung des Spaltungsvertrags 700
- Auslegung durch Bundesgerichtshof 704 ff
- Auslegung durch die Rechtsprechung 697 ff
- Auslegung nach Entstehungsgeschichte des Vertrages 694
- Auslegung nach Wortlaut, Systematik und Zweck 693
- Auslegung und berücksichtigungsfähige Quellen 714
- Auslegung und schuldrechtliche Nebenabreden 714
- Auslegung unter Umständen das nachvertragliche Verhalten 694
- Auslegung unter Umständen das nachvertragliche Verhalten 701
- Auslegung von Ausgliederungsverträgen 700
- Auslegung von Verschmelzungsverträgen 709
- Auslegungsansätze der Literatur 707 ff
- Auslegungsmaßstab 694 f

- Auslegungsmaßstab mit den privatisierungsrechtlichen Besonderheiten 701
- außerhalb der Urkunde liegende Umstände 693
- Begleitumstände des Vertragsschlusses 693
- Bestimmtheitsgrundsatz 695
- Cum-EX-Fall 701 ff
- Formfragen 696
- Literaturmeinungen 707 ff
- objektive Auslegung 703, 708
- objektive Auslegung mit Begrenzung auf korporationsrechtliche Regelungen 710 f
- Rechtsprechungsüberblick 697 ff
- Versicherungsvertreter-Fall 699
- Vertragsinterpretationsarten 693 ff

##### **Unternehmen**

- Russian-Roulette-Klauseln 933 ff
- Stiftung als Instrument der Unternehmensnachfolge 867 f

##### **Unternehmensfinanzierung**

- Abwanderung in andere Kapitalmärkte 295
- Bankfinanzierung 298
- befristeter Anlagehorizont 269
- Beteiligungskapital für junge Unternehmen 269
- Crowdfunding 431 ff
- Eigenkapital 268 f
- Eigenkapitalschöpfung durch Mehrstimmrechtsaktien 321 ff, 339 f
- Entwertung des Proportionalitätsprinzips 325
- Familienunternehmen 291
- fehlende Additionalität 267
- flexible Kapitalgesellschaft („FlexCo“) 486
- Fremdkapital 266 f
- Funding Gap 432
- Green Bonds 267
- Gründerunternehmen 293
- Herausforderungen und Perspektiven aus betriebswirtschaftlicher Sicht 265 ff
- Heterogenität unter den Unternehmen 266
- Hybridanleihen 457 ff
- ideologisch determinierte Formalschranken der Kapitalaufnahme 339
- Kapitalerhöhung 356 ff
- Kapitalerhöhung aus Gesellschaftsmitteln unter Ausschluss des Bezugsrechts 596 ff
- Lebenszyklus von Start-Ups 324
- Mittelstand 291
- Notierungsdynamik 269
- private Eigenkapitalaufnahme 324
- Quellen der Kapitalbeschaffung 266
- Sachkapitalerhöhungen 374 ff

- scale up-Finanzierung 293 f
- Schwarmfinanzierung 431 ff
- Stellenwert der Börsennotierung als Element der Unternehmensfinanzierung 290
- Sustainability-Linked Loans 267
- Venture Capital 509 ff
- Verschlechterung von Finanzierungsbedingungen durch ESG Entwicklung in USA 756
- Wachstumsunternehmen 292
- Wissensunternehmen 294
- Zielbestimmung rechtlicher Gegenmaßnahmen 297

### **Unternehmensgruppen**

- geschäftsleitende Holding 820
- Ergebnisse zur TochterGmbH unter der CSDDD 855
- Finanzholding im Finanzverbund 816
- Gemeinwohlüter-Schutz in den Gruppen-Konstellationen 816
- Gruppenspezifisches in der CSDDD 813
- Möglichkeit beherrschender Einflussnahmen 814 f
- organisationsrechtliche CSDDD-Impulse 857
- Schutz der Gemeinwohlüter in der Unternehmensgruppe 812
- Schutz im Tochterbereich unter einer originär schutspflichtigen Mutter 826
- Schutzpflicht der Muttergesellschaft 819
- Schutzpflichten 812
- Unterstützung zur CSDDD auf der Gruppenebene 833 ff
- vom Schutz- zum Konzernorganisationsrecht 857 ff

### **Unternehmenshybridanleihen 459**

#### **Unternehmensträger mit Vermögensbindung**

- Grundlagen der Vermögensbindung 863
- treuhänderisches Unternehmertum 863
- Unternehmensträger mit eigener Rechtspersönlichkeit 864

#### **Unternehmenswert-Anteile FlexCo**

- Ausgabe 493
- Auskunfts- und Informationsrecht 501
- Bilanzgewinn 497
- Eintragung ins Firmenbuch 495
- flexible Kapitalgesellschaft („FlexCo“) 492 ff
- Gleichbehandlung der Beteiligten 501 f
- Liquidationserlös 497
- Minderheitenrechte 500
- Mitverkaufsrecht 502 f
- Rechte und Pflichten der Beteiligten 496

- Rechtsnatur 492
- Stimmrechte 497 f
- Übernahme 494
- Vesting-Programme 495

### **Venture Capital**

- Abgrenzung zu Private Equity 510
- Aufsichtsorgan 515 ff, 525 ff
- Beirat 515 ff
- Charakteristika 510
- Durchsetzung der Schadensersatzansprüche 515
- Entsenderechte und Stimmbindungsvereinbarungen 526
- Exit 512
- Garantieabgabe durch die AG/SE 521
- Garantien 514
- Haftungsregime 514
- Information der Investoren 512
- innovative Geschäftsmodelle 510
- Interessenlage von Investoren 512
- Kapitalerhaltung 523 ff
- Liquidations- und Erlöspräferenz 518 f
- Liquidationspräferenzen über die AG- bzw. SE-Umwandlung hinaus 531 ff
- Minderheitsbeteiligungen 511
- Poolingvereinbarung 528
- Überwachung und Kontrolle 512
- Umsetzung in der AG und SE 520
- Umsetzung in der GmbH 513
- Verkaufserlöse 513
- Vertragsgestaltung bei Venture Capital Finanzierungsrunden 513
- Vielzahl unterschiedlicher Investoren 511
- wiederkehrende Eigenkapitalfinanzierungsrunden 510
- wirtschaftliche Investorenschutzrechte 512

### **Verlautbarungen nationaler und internationaler Institutionen**

- Außenwirkung 46
- GAAS 46
- IDW PH 46
- IDW PS, IDW PS KUM 46
- ISA (DE), ISA 46
- Vorschläge für die Konkretisierung des Gesetzes 46

### **Verordnung über europäische grüne Anleihen (EuGBS-VO) 398**

#### **Vorstand**

- Vergütung mit variablen, klimaschutzfördernden Vergütungsparametern 189

#### **Vorzugsaktien**

- Anteilsgewährung 923

- Anwendung von § 141 AktG in Umwandlungsfällen 915
  - Beeinträchtigungen der Vorzugsaktionäre i. S.v. § 141 Abs. 1 AktG bei rechtsformübergreifenden Verschmelzungen und Spaltungen sowie beim Formwechsel 921
  - Diskussion nach Inkrafttreten des UmwG 1995 906
  - Gewährung art- oder gattungsgleicher Rechte 924
  - keine gespaltene Auslegung für Umwandlungen außerhalb des Anwendungsbereichs von Art. 93 Abs. 2 GesRRL 920
  - Metro-Fall 910ff
  - Qualifikation als Sonderrecht 900
  - Rechtslage bei Formwechsel der Aktiengesellschaft 908
  - Rechtslage vor Inkrafttreten des UmwG 1995 904
  - Schutz der Vorzugsaktionäre außerhalb des Umwandlungsrechts 900
  - Schutz der Vorzugsaktionäre bei Umwandlungen 911
  - Schutz vor nachteiligen Eingriffen bei stimmrechtslosen Vorzugsaktien 903
  - Schutz vor nachteiligen Eingriffen in aktienrechtliche Gattungs-Sonderrechte 901
  - Sonderbeschluss der Vorzugsaktionäre außerhalb des Anwendungsbereichs von Art. 93 Abs. 2 GesRRL 920
  - Sonderbeschluss der Vorzugsaktionäre außerhalb des Anwendungsbereichs von Art. 93 Abs. 2 GesRRL 920
  - Umwandlung von Vorzugsaktien in Stammaktien 916
  - Verschlechterung des Vorzugs 918
  - Vorzugsaktien als Gattungs-Sonderrechte 900
  - Vorzugsaktien ohne Stimmrecht als besondere Aktiengattung 898
  - Vorzugsaktionären sind Vorzugsaktien anderer Rechtsform zu gewähren 923
- Wertpapiererwerbs- und Übernahmegesetz**
- Bestimmung der „Gegenleistung“ i. S. d. § 31 WpÜG 638
  - Bestimmung der Gegenleistungshöhe in § 31 Abs. 1 WpÜG 639
  - Business Combination Agreements bzw. Investment Agreements 640
  - europarechtlicher Blickwinkel für Nacherwerbe und gleichgestellte Vereinbarungen 641f
  - Gleichbehandlung der Aktionäre 641
  - Nacherwerb 640
  - Nachzahlungspflicht der Bieterin 640
  - Preisthematik bei öffentlichen Übernahmen 637f
  - STADA-Entscheidung 637ff
  - verwendeten Erwerbsbegriffs 639
- Zukunftsfinanzierungsgesetz – ZuFinG**
- 85, 322, 598
